# Supplementary material for: NR2F6 as a Prognostic Biomarker in HNSCC
Source: PubMed Central journal article supplement (PMC7432340; doi:10.3390/ijms21155527), 2020-08-01
Supplement: ijms-21-05527-s001.pdf [file ijms-21-05527-s001.pdf]

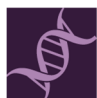

### Supplementary Materials

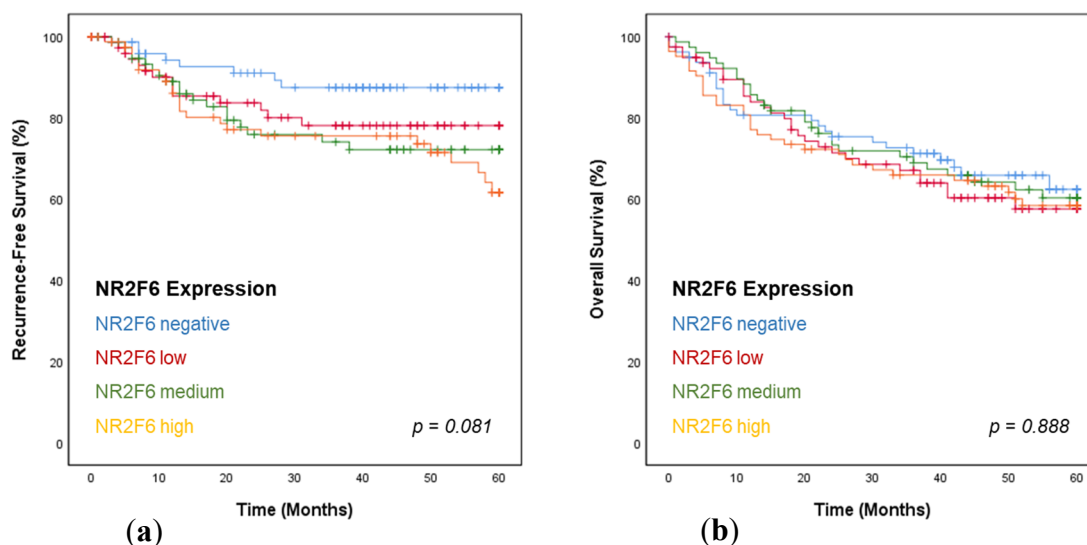

**Figure S1.** Kaplan Meier Analysis for negative, low, medium, and high NR2F6-expressing HNSCC. There are no significant differences in the (a) RFS ( $p = 0.081$ ) and (b) OS ( $p = 0.888$ ) of HNSCC patients with NR2F6 negative, low, medium, and high expressing PTs.

**Table S1.** Correlation of LR and the NR2F6 expression in PTs at different tumor sites (Mann-Whitney test, \*  $p \leq 0.05$ ; \*\*  $p \leq 0.01$ ).

| Tumor Site  | LR  | Number of Patients | Median NR2F6 Expression | Mean NR2F6 Expression | <i>p</i> -value |
|-------------|-----|--------------------|-------------------------|-----------------------|-----------------|
| Pharynx     | No  | 120                | 8.146                   | 10.906                | 0.014 *         |
|             | Yes | 28                 | 16.457                  | 16.483                |                 |
| Larynx      | No  | 79                 | 3.399                   | 6.310                 | 0.010 **        |
|             | Yes | 34                 | 9.949                   | 13.718                |                 |
| Oral Cavity | No  | 56                 | 2.011                   | 6.739                 | 0.040 *         |
|             | Yes | 20                 | 8.622                   | 9.813                 |                 |

**Table S2.** Univariate and multivariate cox regression for 5-year RFS (\*  $p \leq 0.05$ ; \*\*  $p \leq 0.01$ )

| Variable         | Univariate Cox Regression |              |                         | Multivariate Cox Regression |              |                         |
|------------------|---------------------------|--------------|-------------------------|-----------------------------|--------------|-------------------------|
|                  | <i>p</i> -value           | Hazard Ratio | 95% Confidence Interval | <i>p</i> -value             | Hazard Ratio | 95% Confidence Interval |
| NR2F6 expression | 0.028 *                   | 2.296        | 1.092–4.824             | 0.014 *                     | 2.551        | 1.211–5.374             |
| T Stage          | 0.002 **                  | 1.954        | 1.267–3.014             | 0.063                       | 2.004        | 0.962–4.174             |
| UICC Stage       | 0.021 *                   | 1.685        | 1.082–2.625             | 0.819                       | 0.910        | 0.404–2.047             |
| p16 expression   | 0.003 **                  | 0.430        | 0.246–0.751             | 0.007 **                    | 0.342        | 0.156–0.748             |

**Table S3.** Correlation of the NR2F6 expression with clinicopathological features of HNSCC patients (Mann–Whitney test).

| <b>Clinicopathological Feature</b> | <b>Number of Patients</b> | <b>Mean NR2F6 Expression</b> | <b>Median NR2F6 Expression</b> | <b>p-value</b> |
|------------------------------------|---------------------------|------------------------------|--------------------------------|----------------|
| <b>Age</b>                         | <61                       | 152                          | 9.95                           | 0.496          |
|                                    | >61                       | 176                          | 9.52                           |                |
| <b>Sex</b>                         | Female                    | 73                           | 9.83                           | 0.965          |
|                                    | Male                      | 256                          | 9.70                           |                |
| <b>Alcohol abuse</b>               | Yes                       | 142                          | 9.41                           | 0.465          |
|                                    | No                        | 176                          | 11.29                          |                |
| <b>Nicotine abuse</b>              | Yes                       | 281                          | 9.56                           | 0.708          |
|                                    | No                        | 32                           | 9.02                           |                |
| <b>p16 expression</b>              | Yes                       | 86                           | 9.27                           | 0.140          |
|                                    | No                        | 244                          | 11.13                          |                |
